# Supplementary material for: A importância da Documentação na Construção da História
Source: MDPI journal article supplement (doi:10.3390/md20020080), 1996-01-01
Supplement: s1 [file s1]

**Supporting Information**  
**for**  
**New Trichothecenes Isolated from the Marine Alga**  
**Endophytic Fungus *Trichoderma brevicompactum***

Safwan Safwan, Shih-Wei Wang, George Hsiao, Sui-Wen Hsiao, Su-Jung Hsu, Tzong-Huei Lee and Ching-Kuo Lee

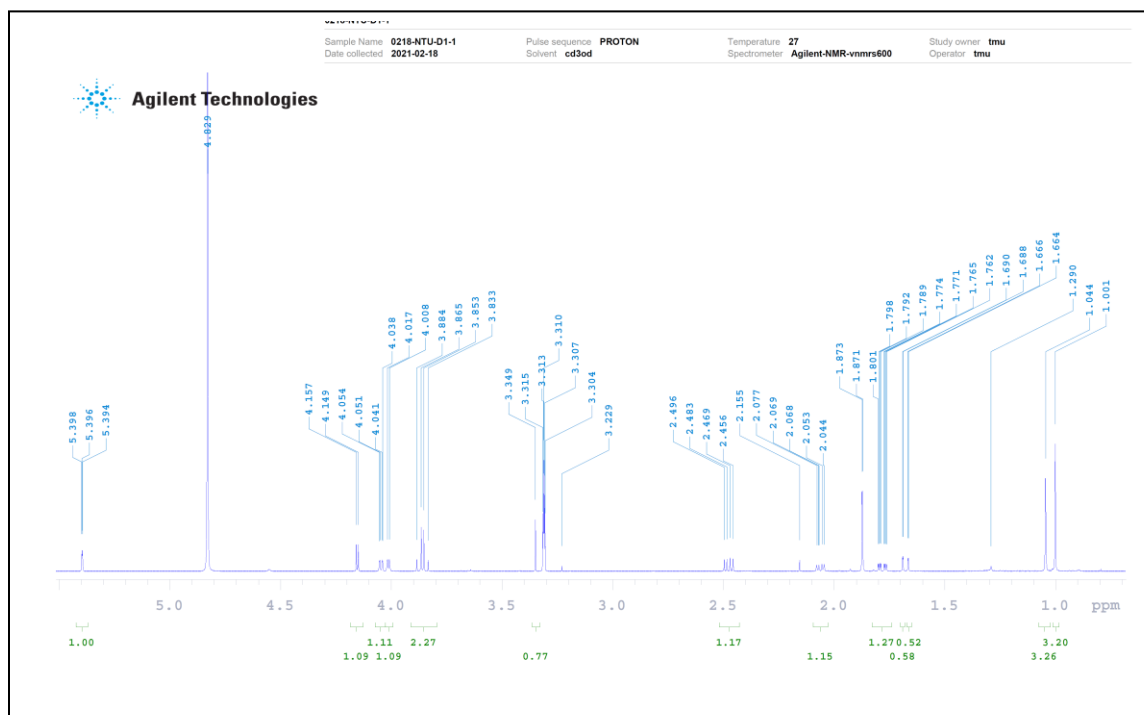

Figure S1.  $^1\text{H}$  NMR (600 MHz,  $\text{MeOH-}d_4$ ) of **1**

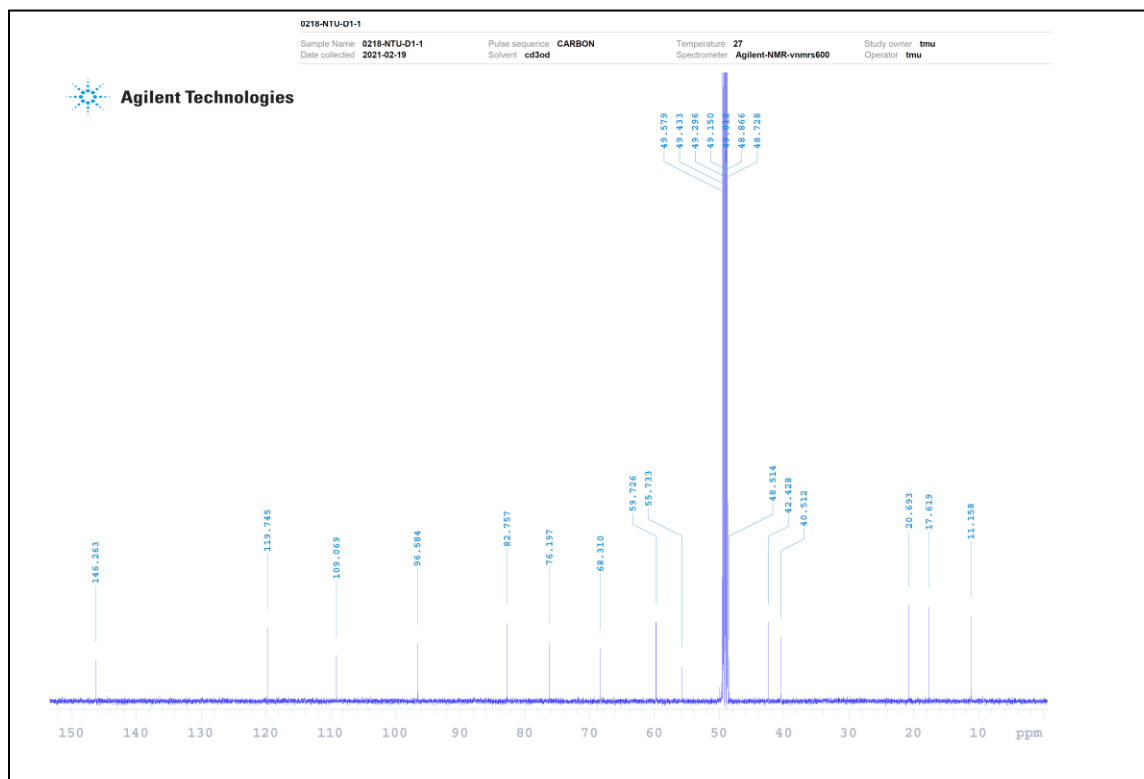

Figure S2.  $^{13}\text{C}$  NMR (150 MHz,  $\text{MeOH-}d_4$ ) of **1**

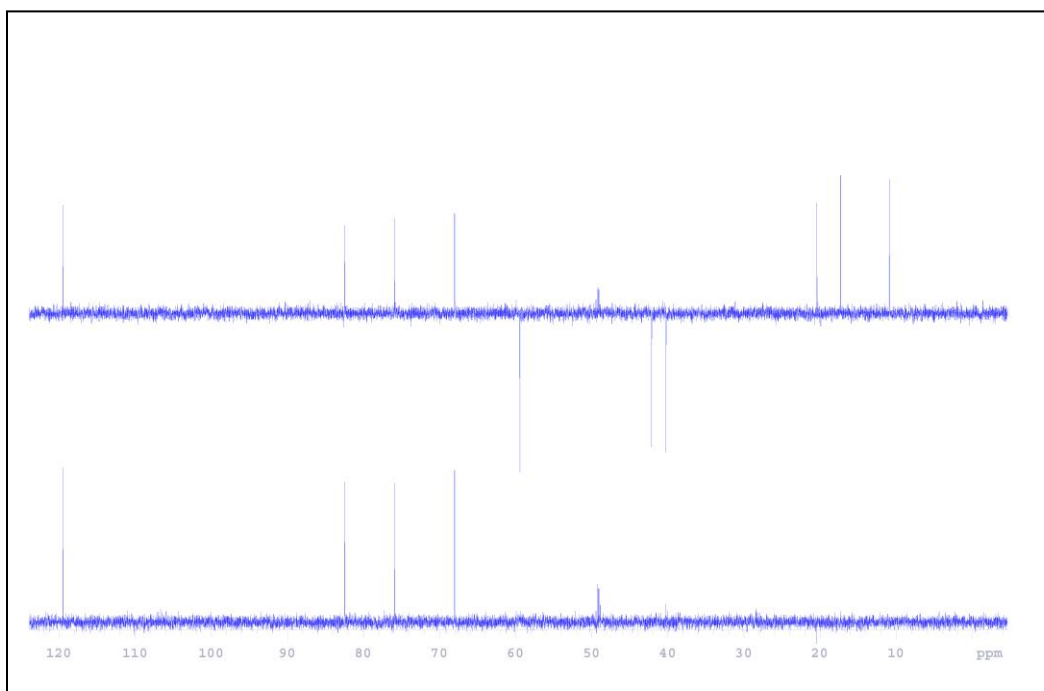

Figure S3. DEPT -90 (down) and -135 (up) of **1**.

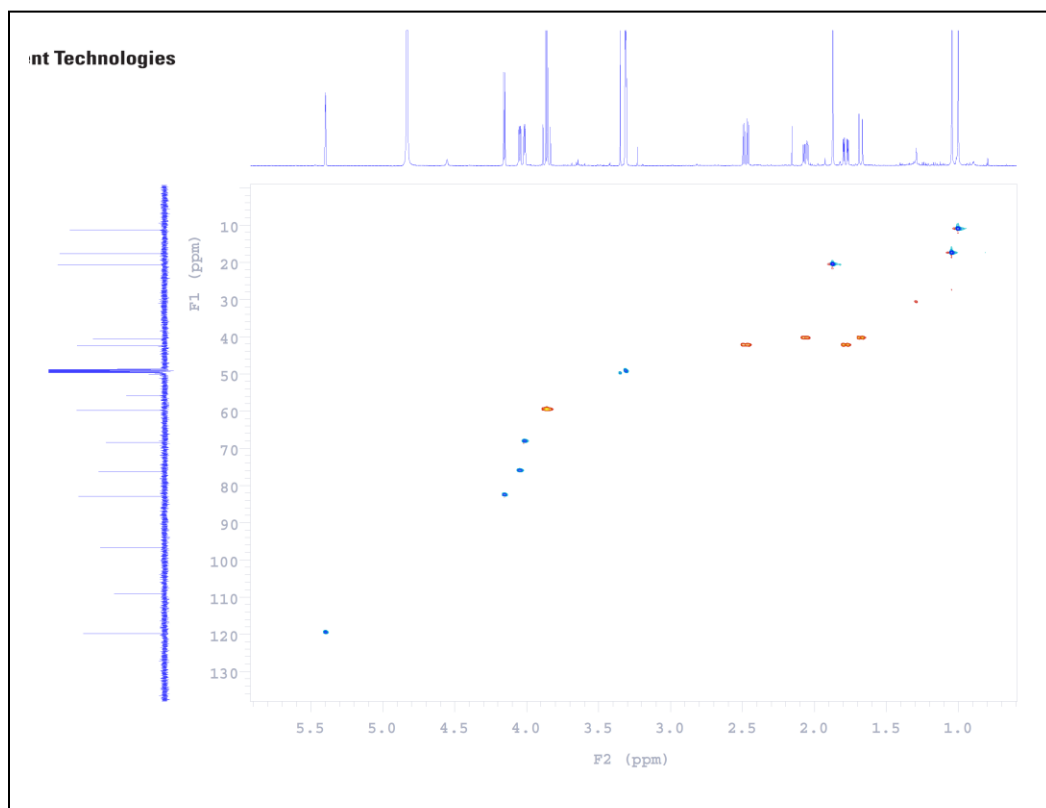

Figure S4. HSQC of **1**.

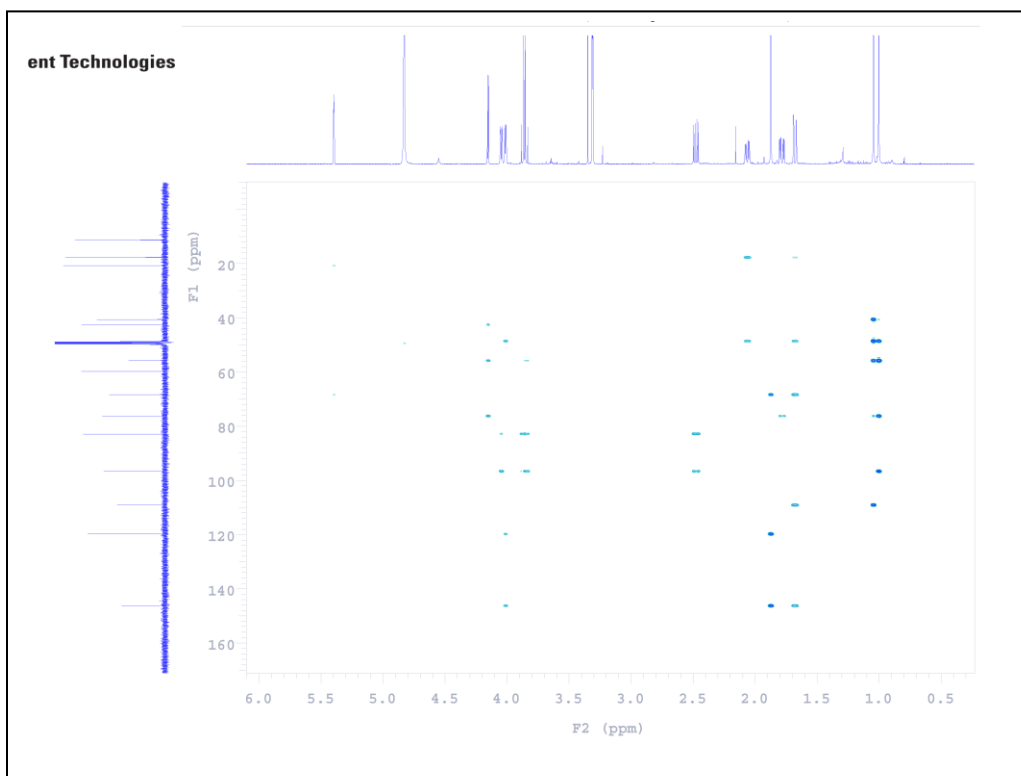

Figure S5. HMBC of **1**.

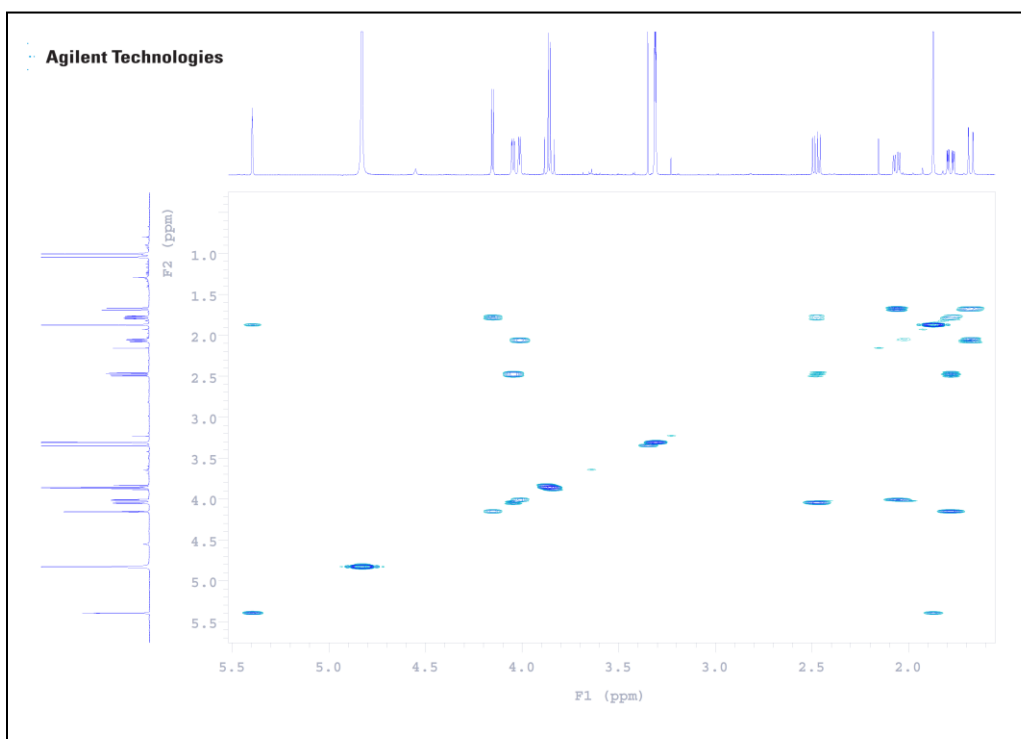

Figure S6. COSY of **1**.

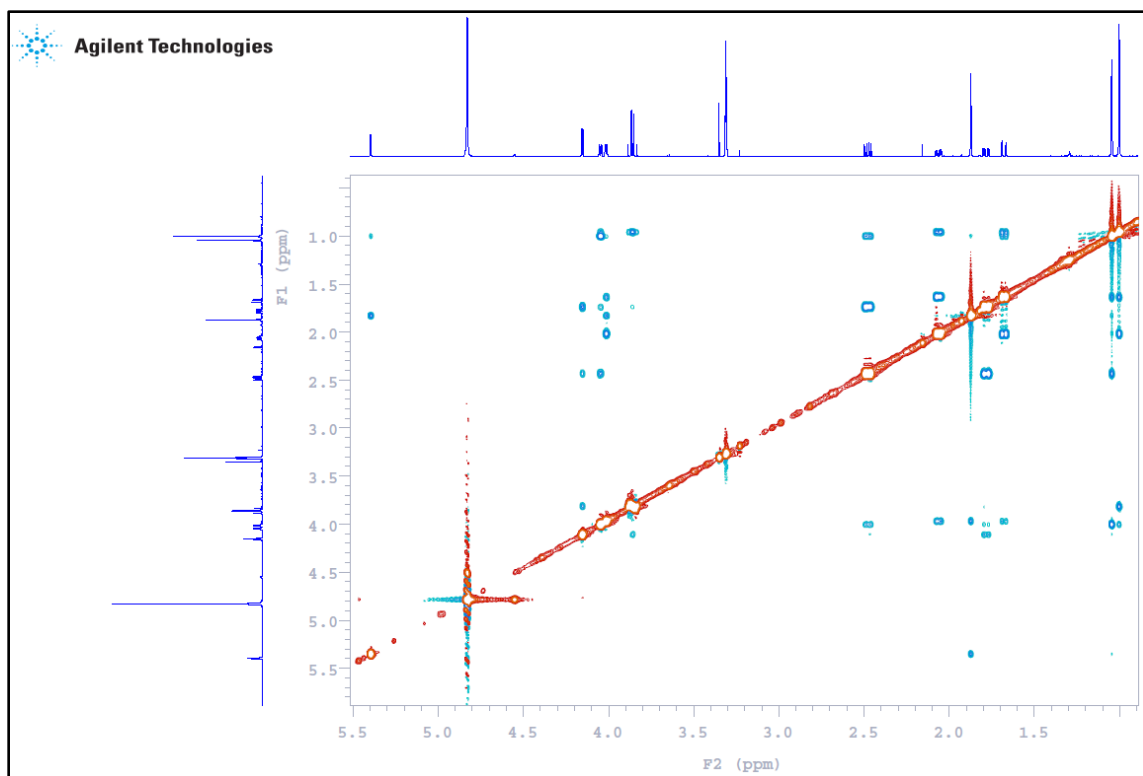

Figure S7. NOESY of **1**.

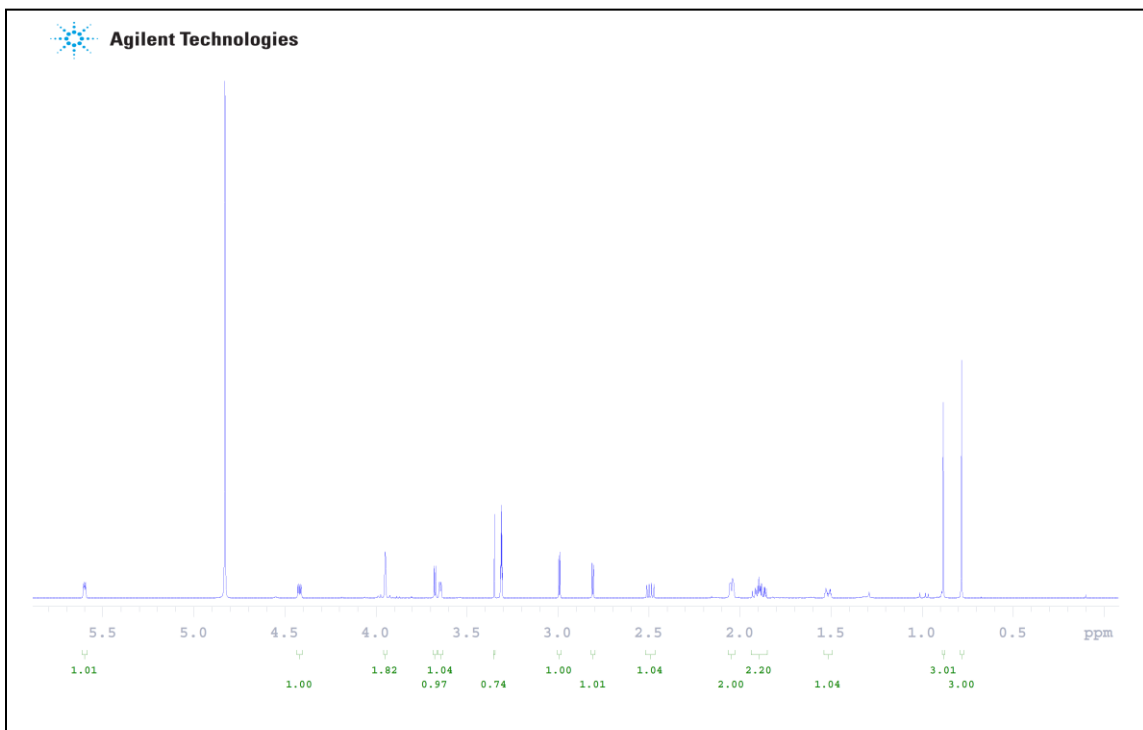

Figure S8. <sup>1</sup>H NMR (600 MHz, MeOH-*d*<sub>4</sub>) of **2**

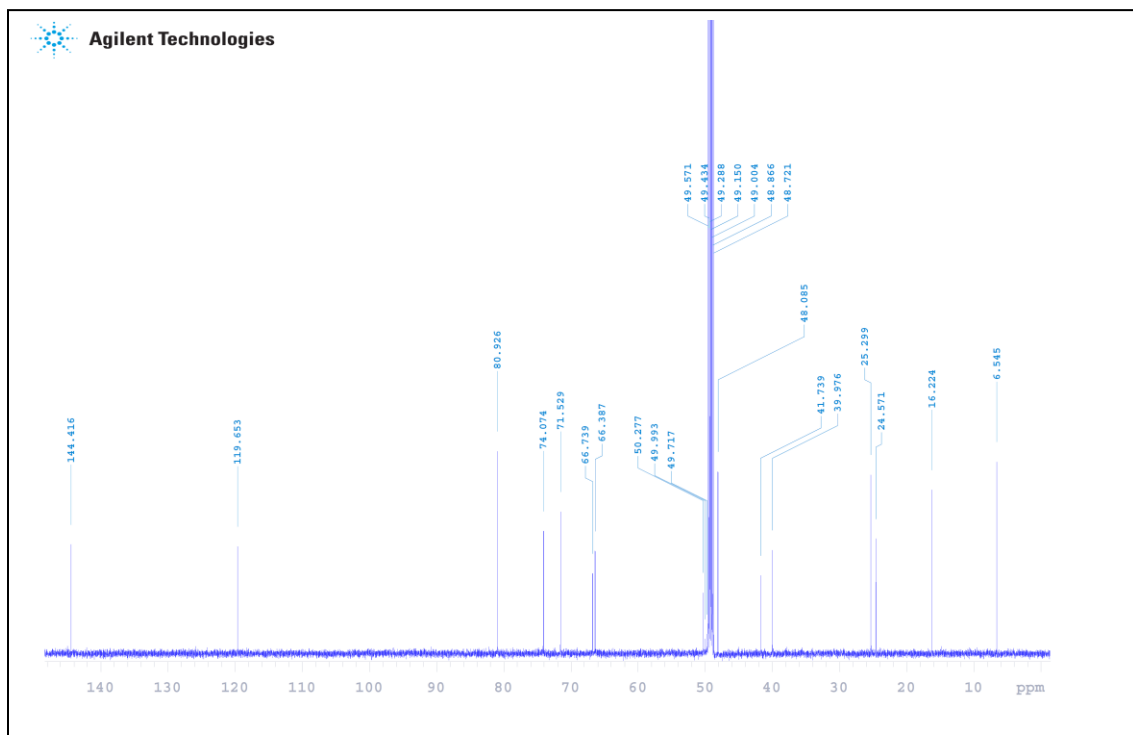

Figure S9.  $^{13}\text{C}$  NMR (150 MHz,  $\text{MeOH-}d_4$ ) of **2**.

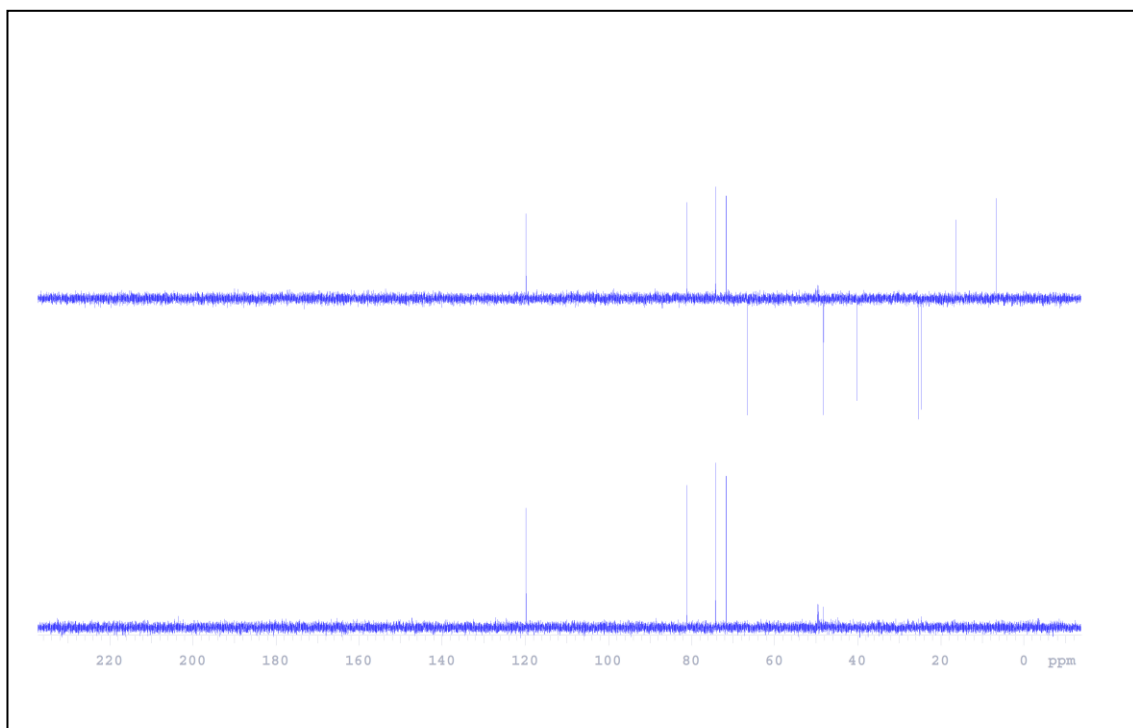

Figure S10. DEPT -90 (down) and -135(up) of **2**

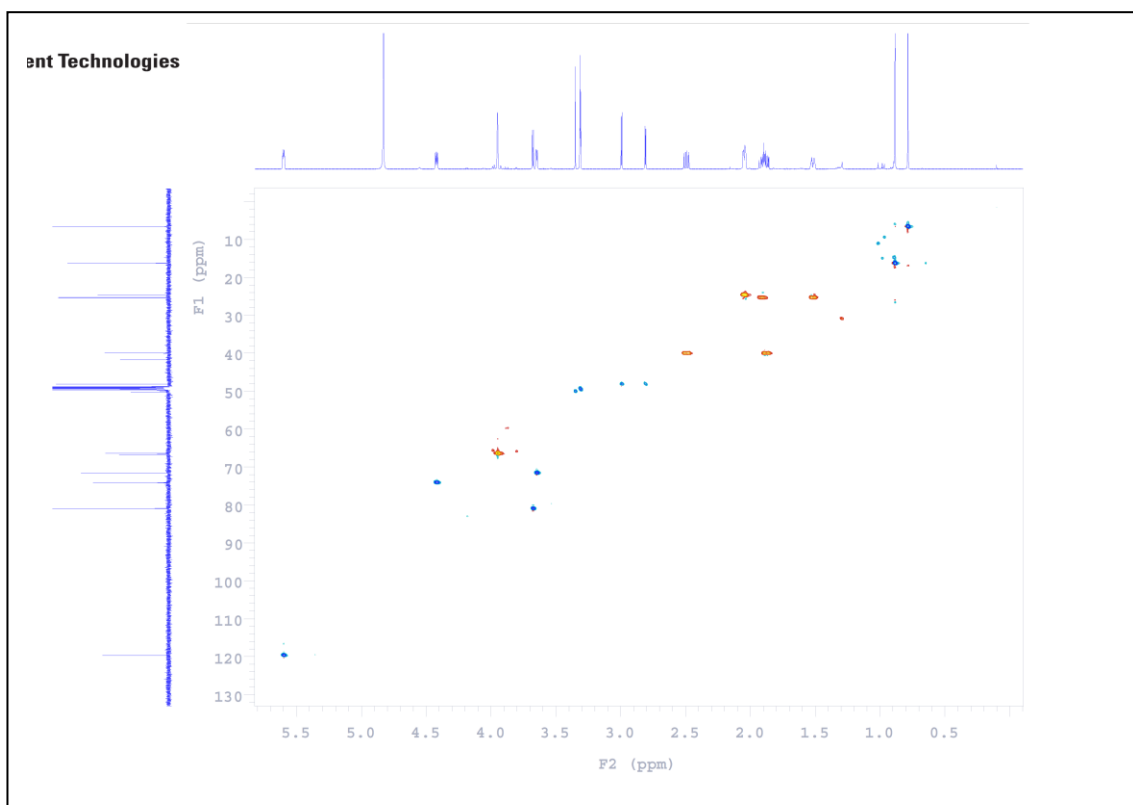

Figure S11. HSQC of **2**

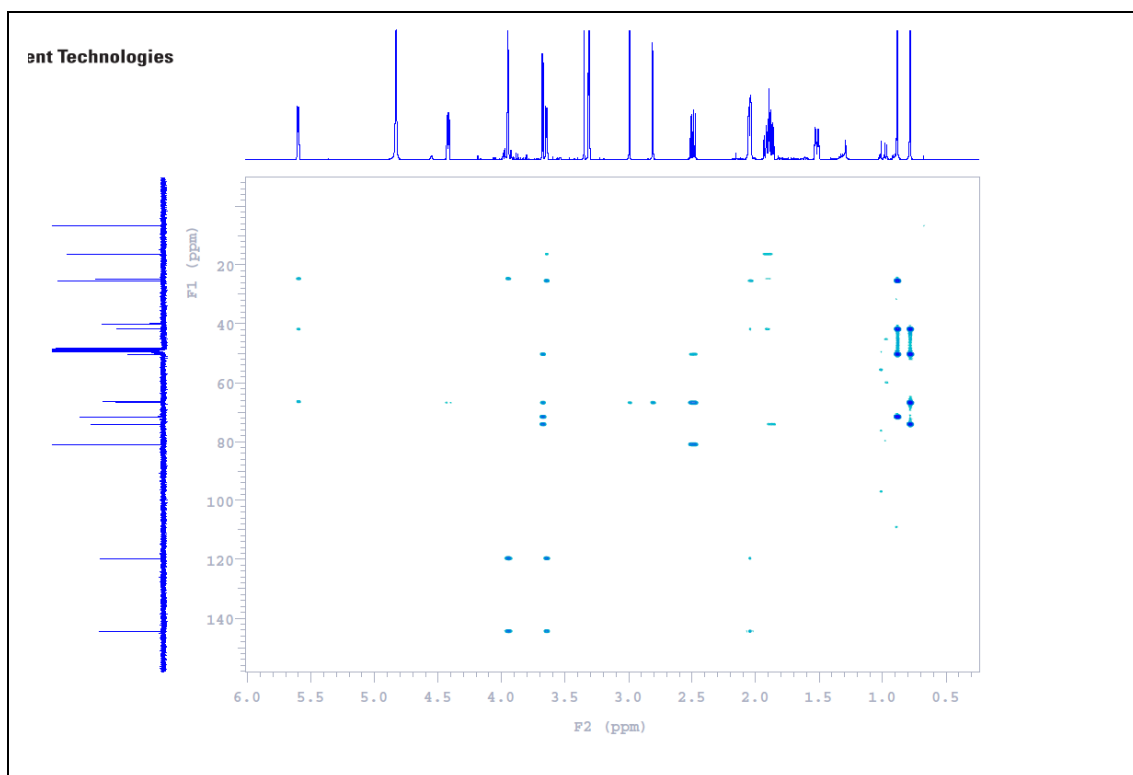

Figure S12. HMBC of **2**.

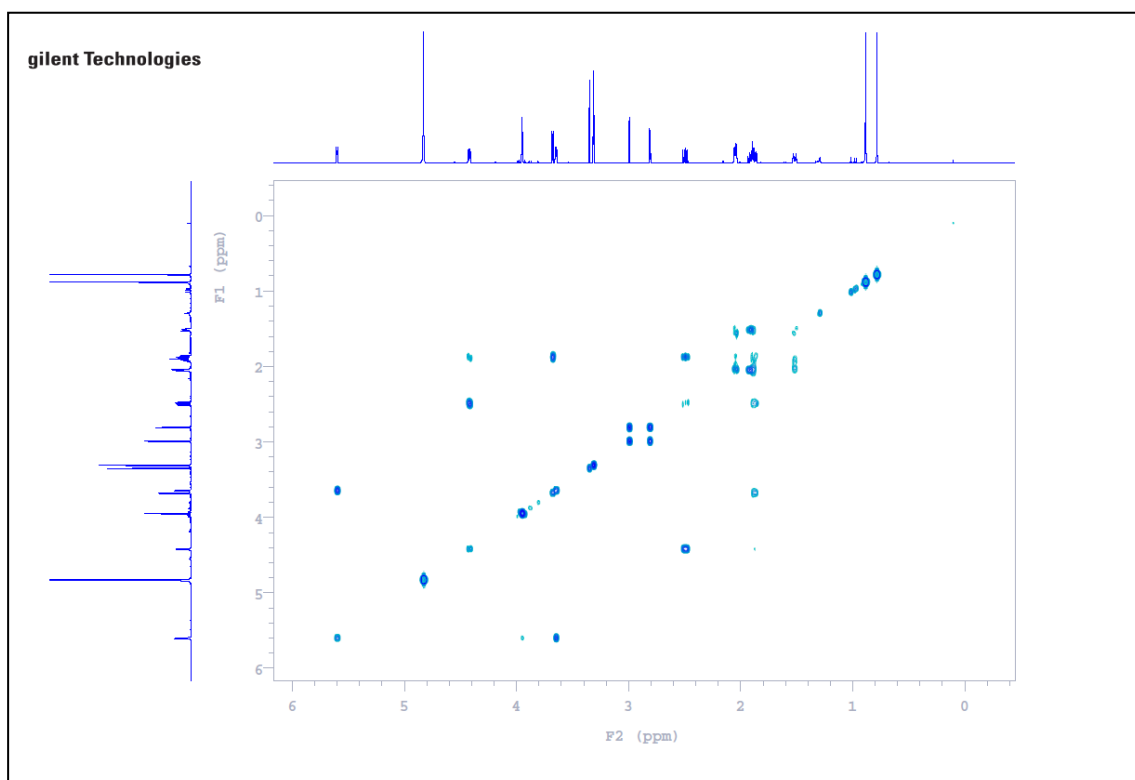

Figure S13. COSY of **2**.

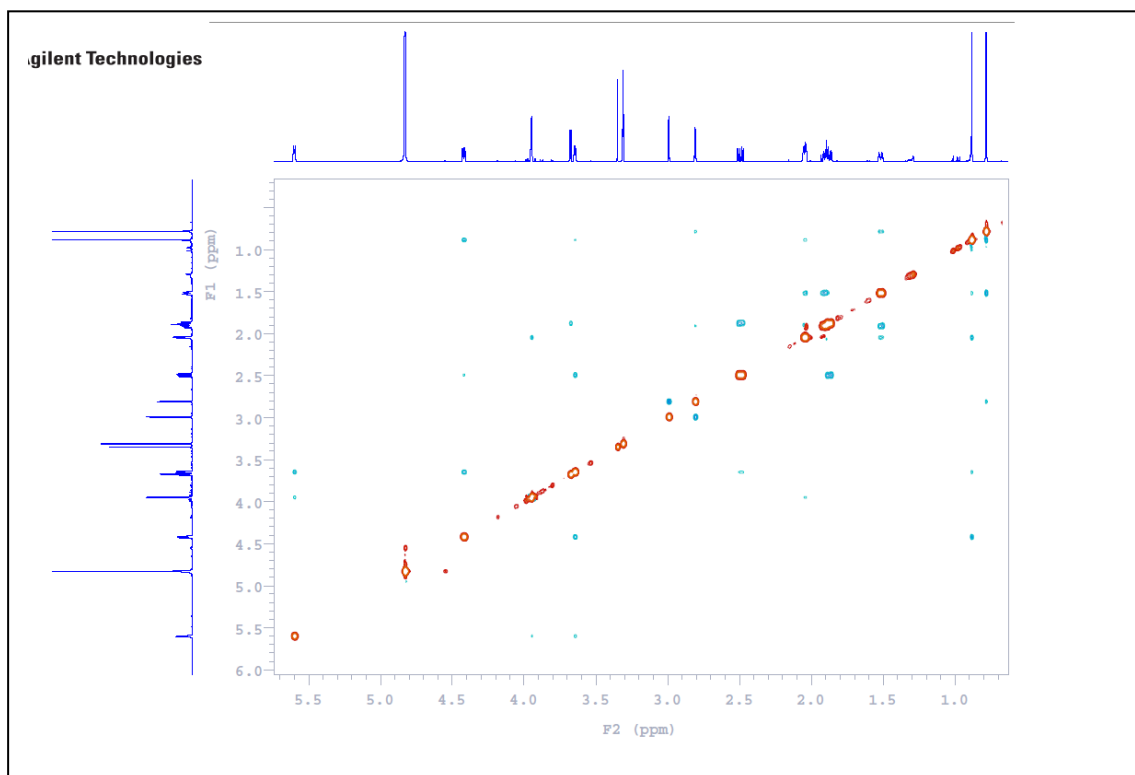

Figure S14. NOESY of **2**.



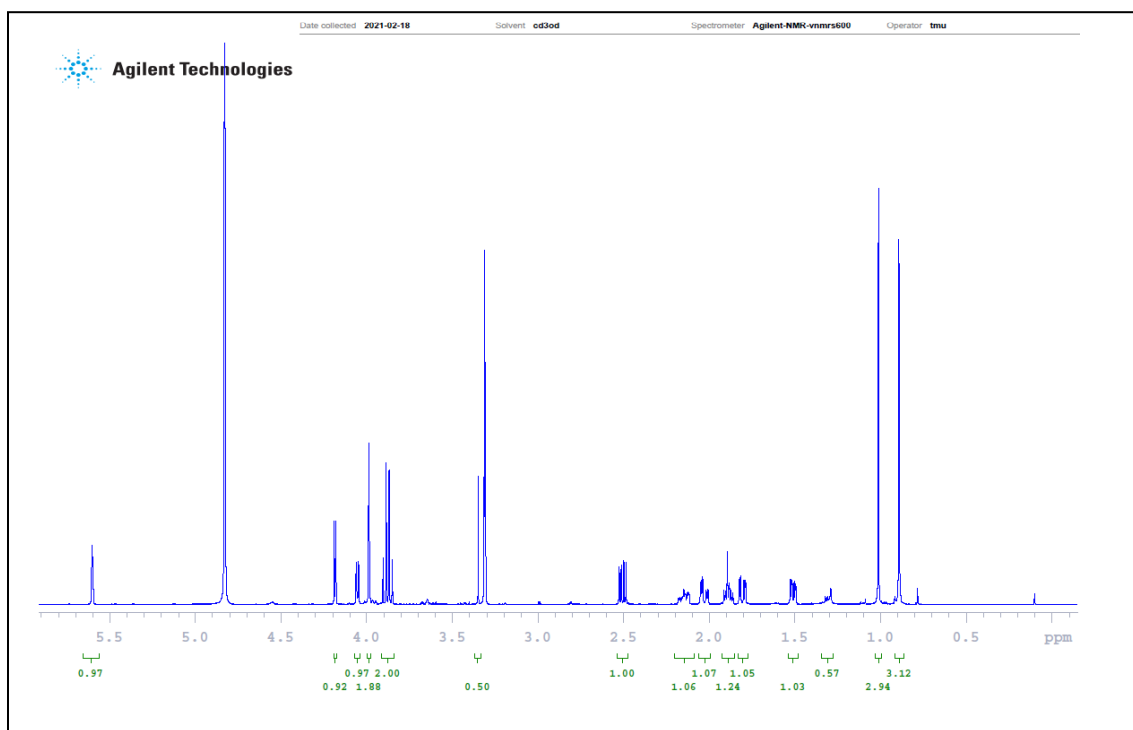

Figure S15.  $^1\text{H}$  NMR (600 MHz,  $\text{MeOH-}d_4$ ) of **3**

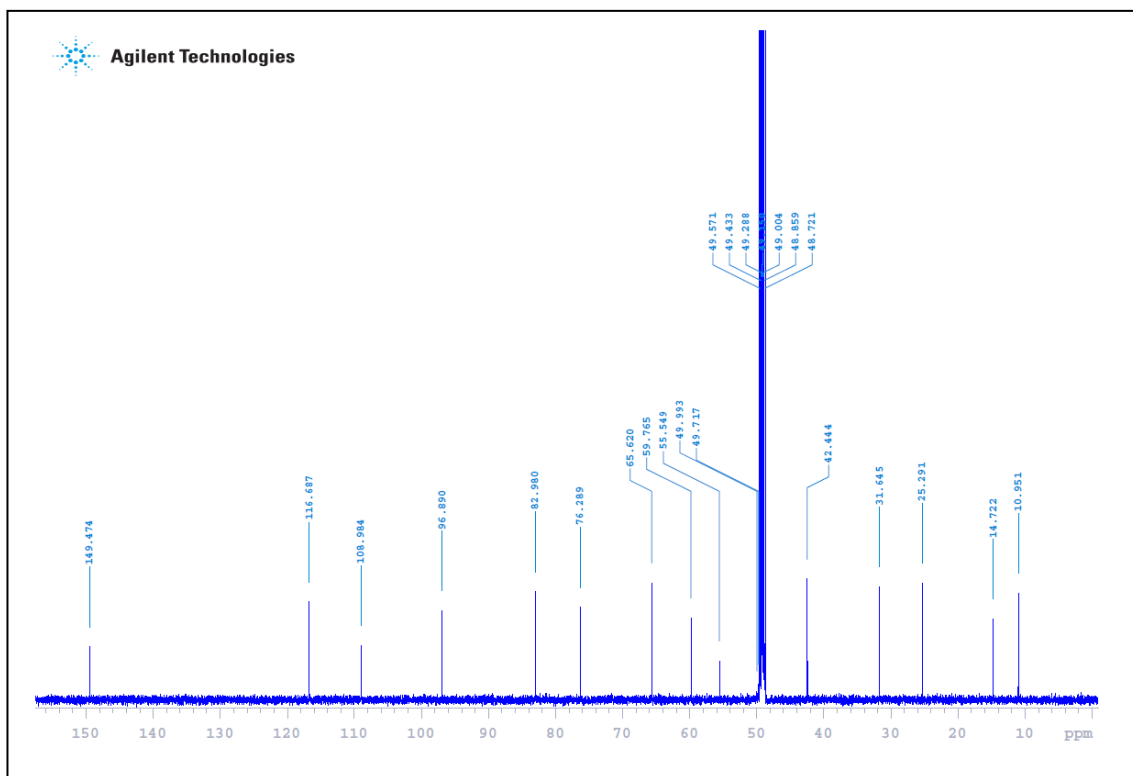

Figure S16.  $^{13}\text{C}$  NMR (150 MHz,  $\text{MeOH-}d_4$ ) of **3**

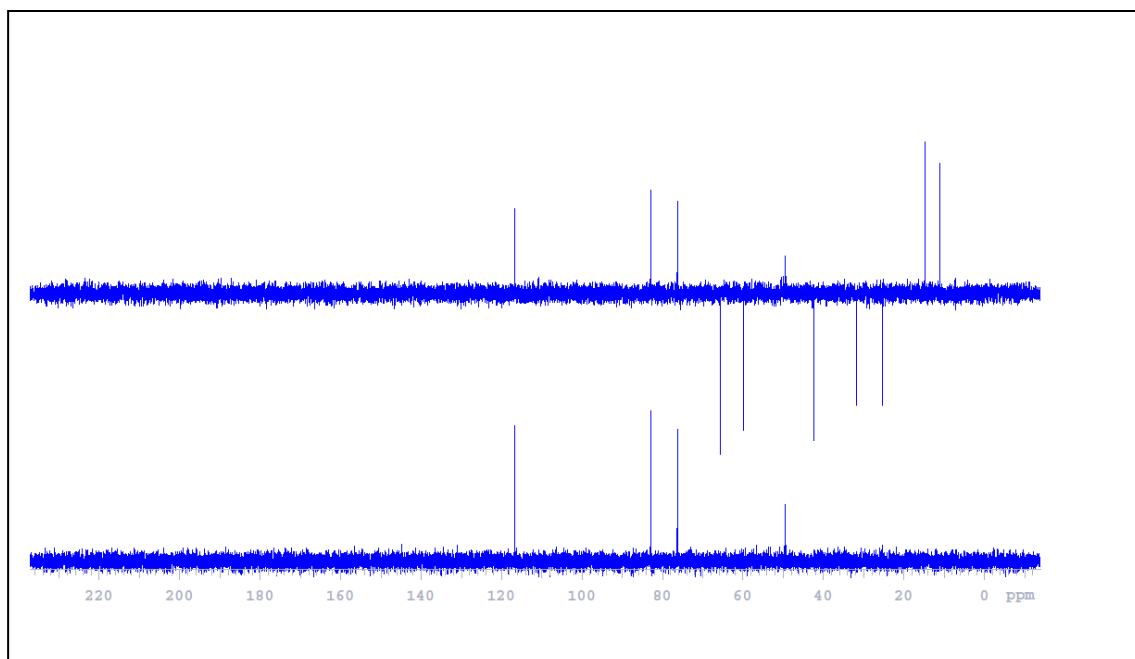

Figure S17. DEPT -90 (down) and -135(up) of **3**.

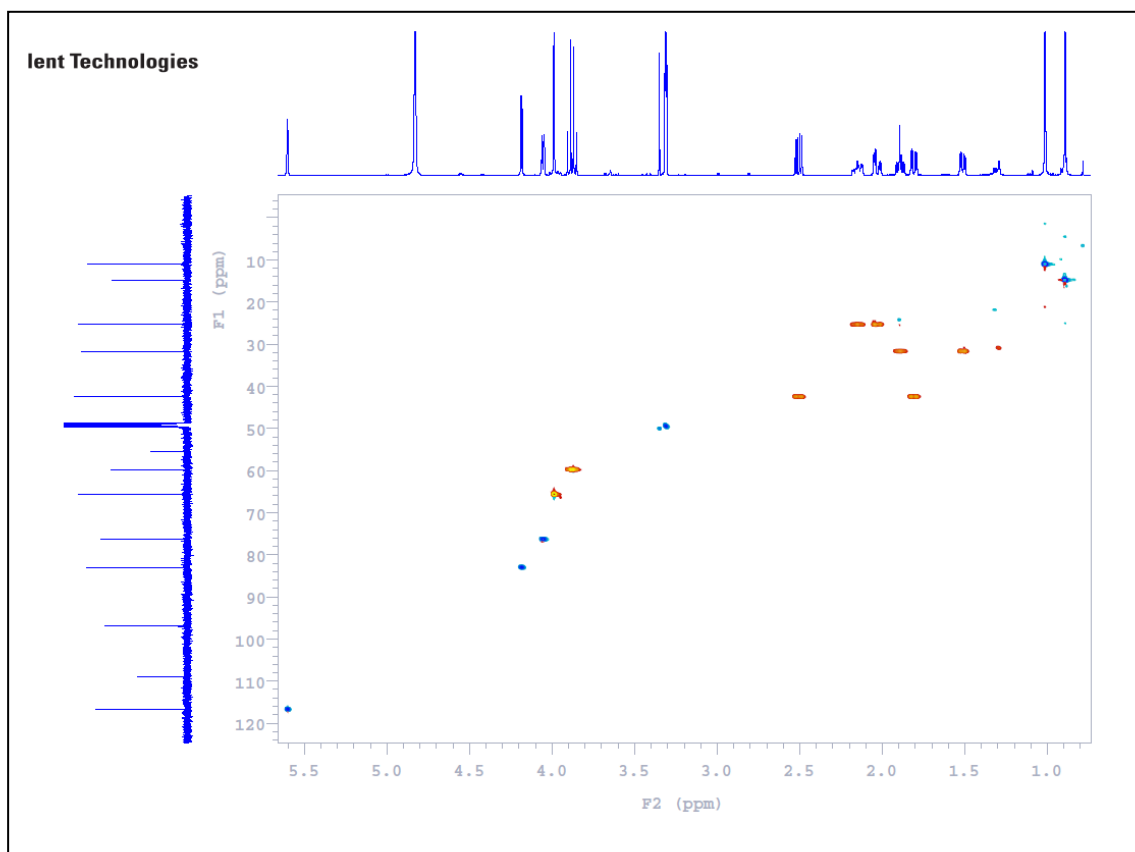

Figure S18. HSQC of **3**.

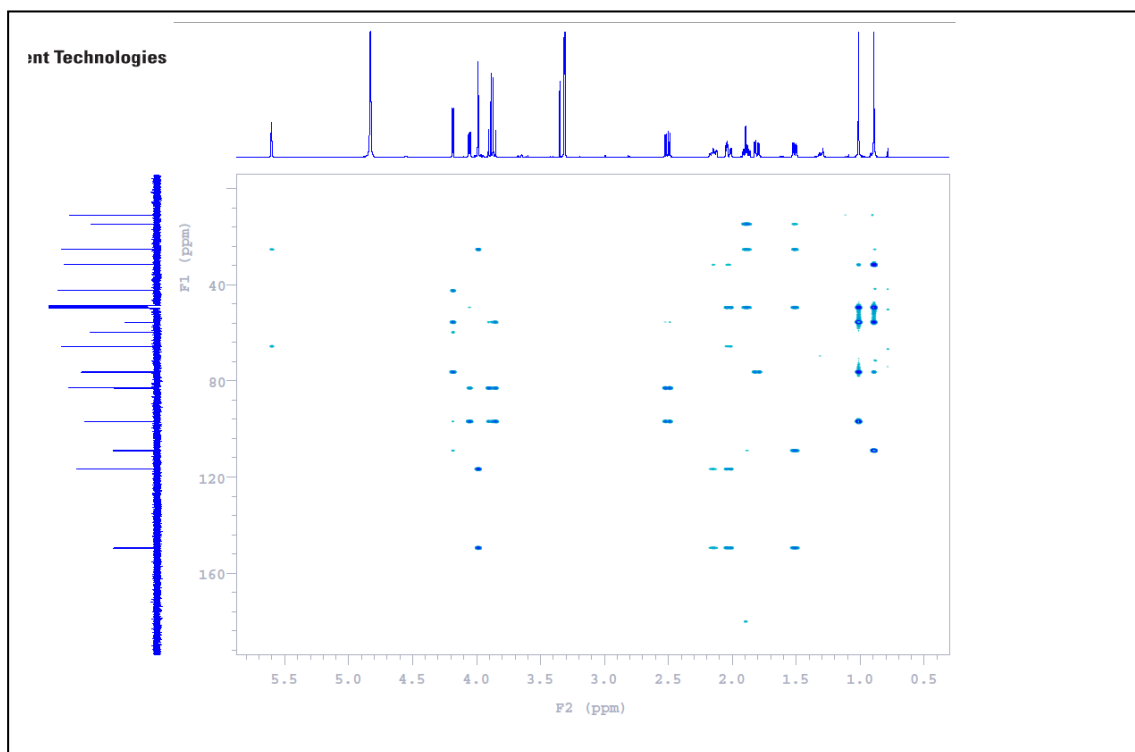

Figure S19. HMBC of **3**.

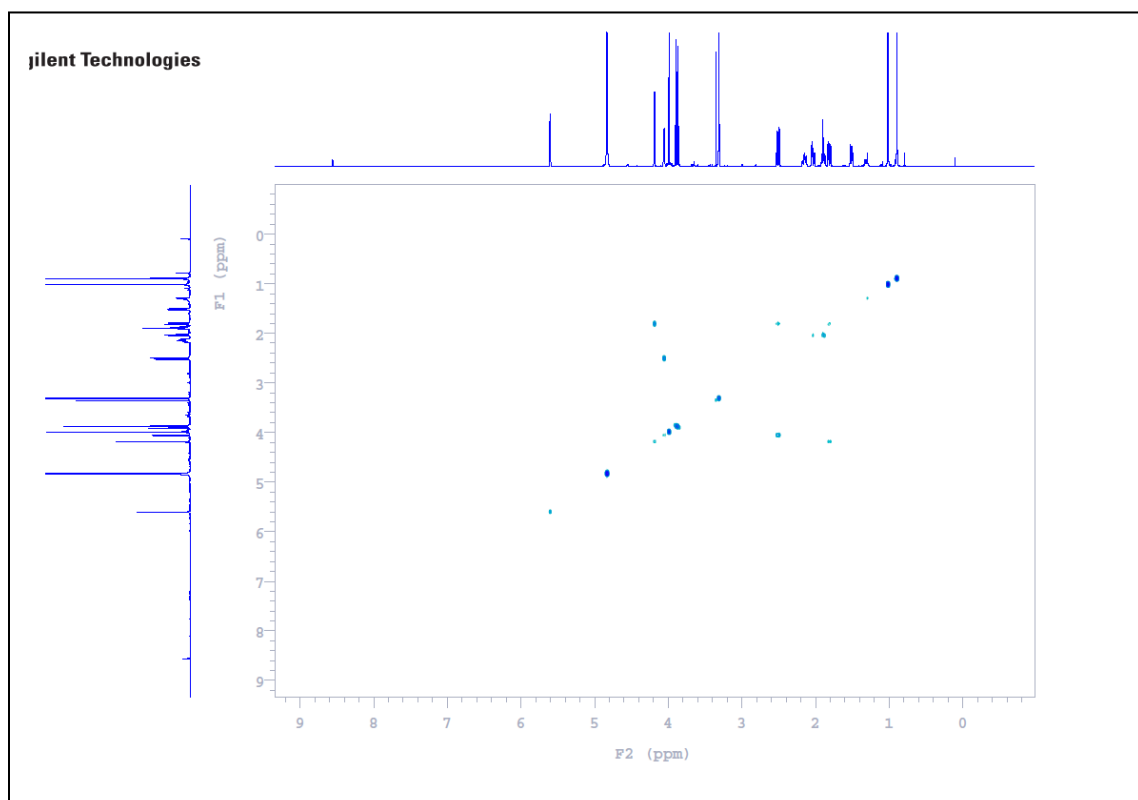

Figure S20. COSY of **3**.

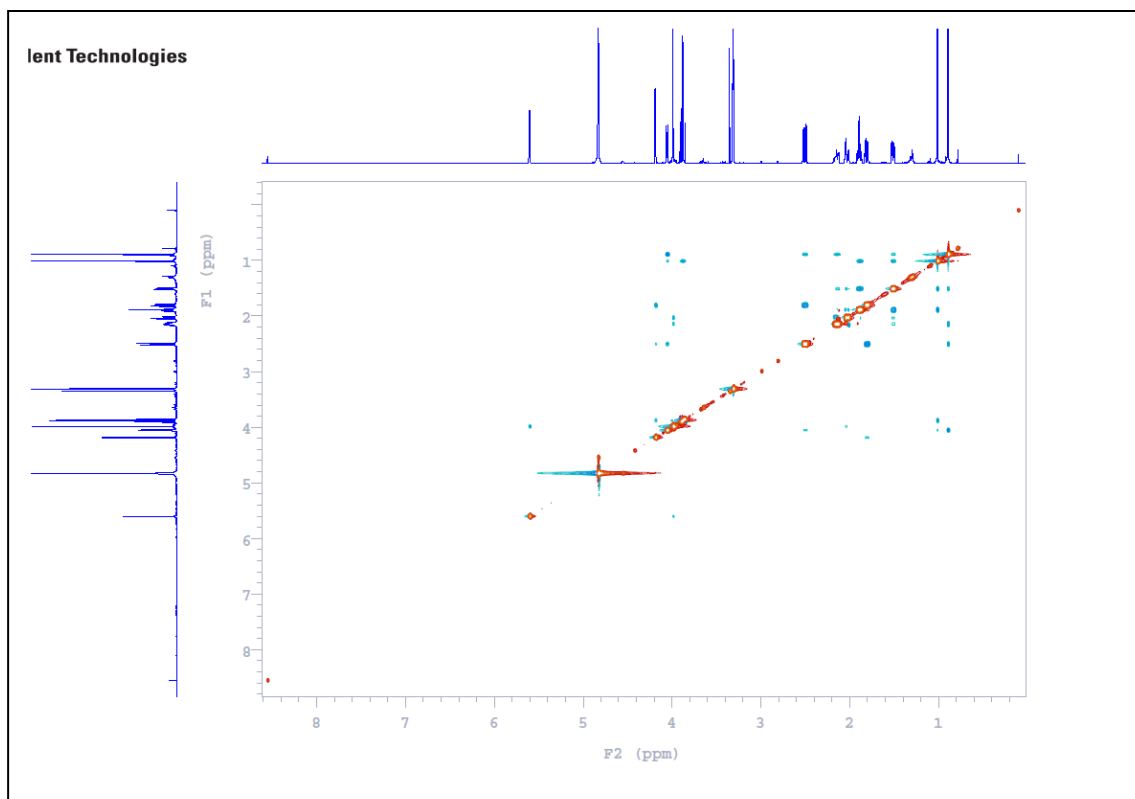

Figure S21. NOESY of **3**.

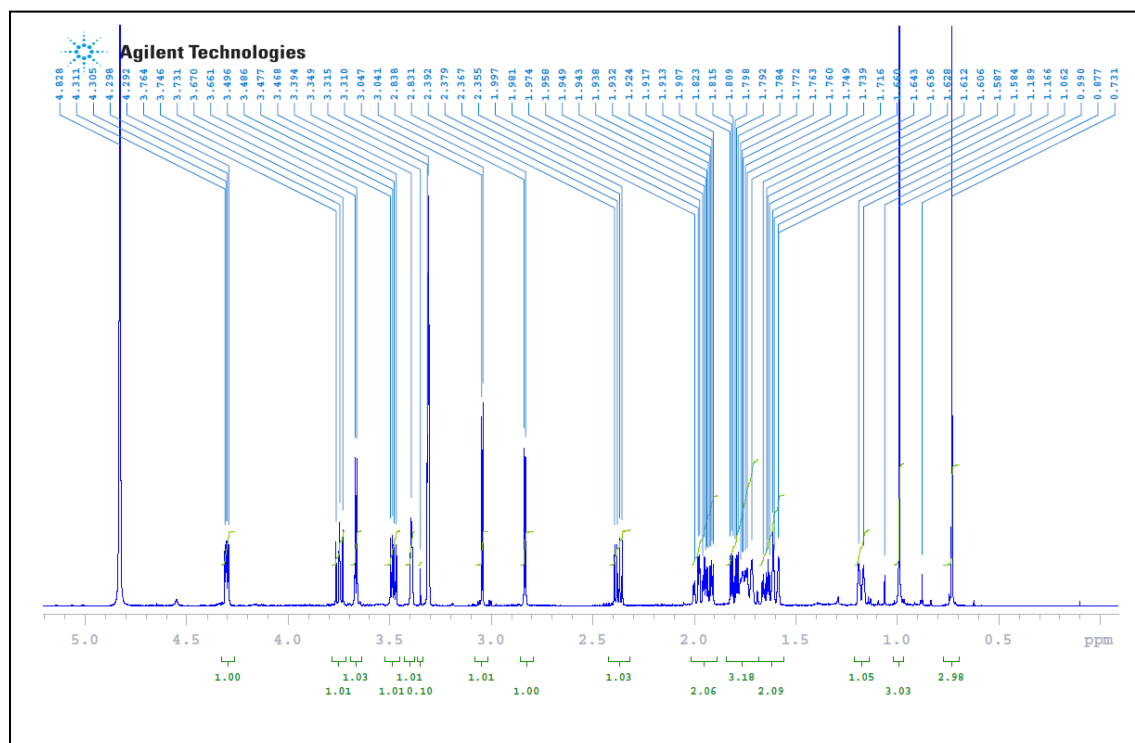

Figure S22.  $^1\text{H}$  NMR (600 MHz,  $\text{MeOH-}d_4$ ) of **4**.

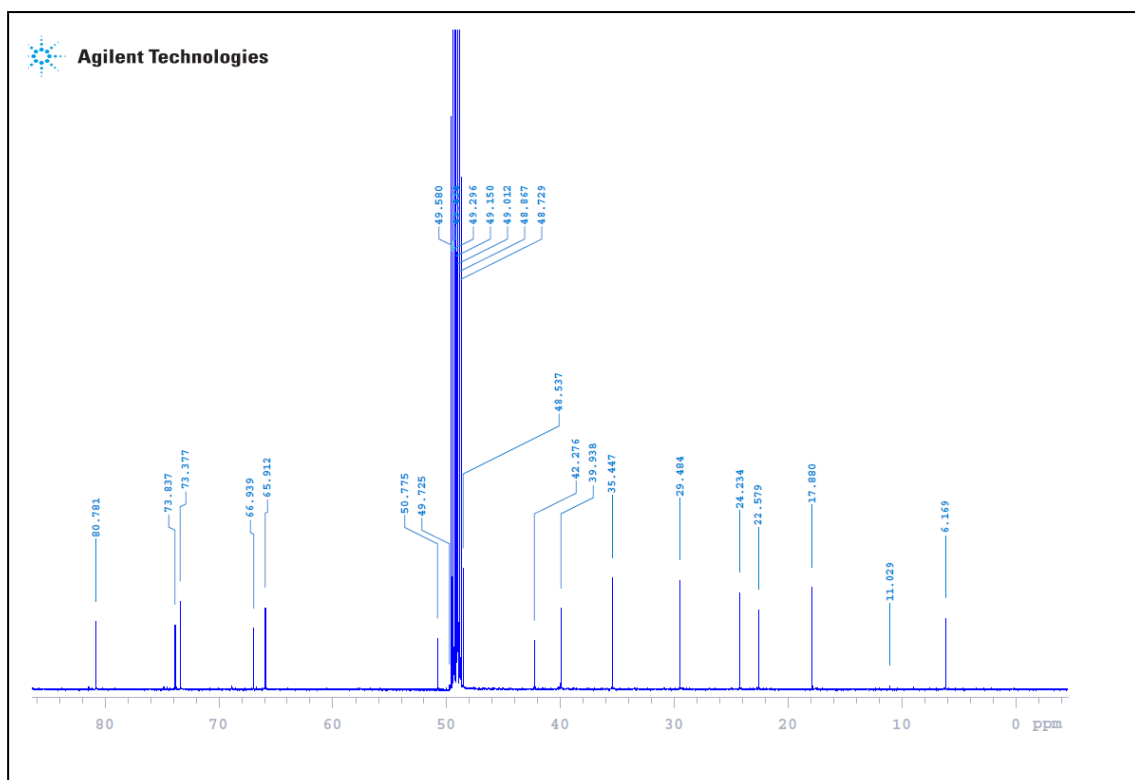

Figure S23.  $^{13}\text{C}$  NMR (150 Hz,  $\text{MeOH-}d_4$ ) of **4**.

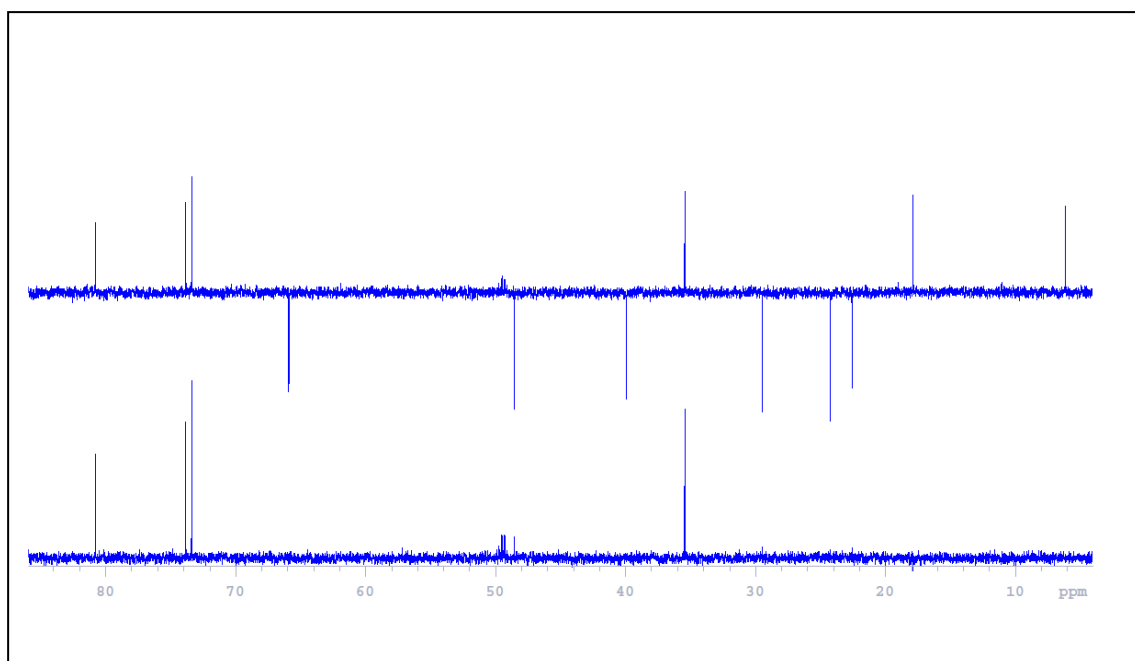

Figure S24. DEPT -90 (down) and -135(up) of **4**.

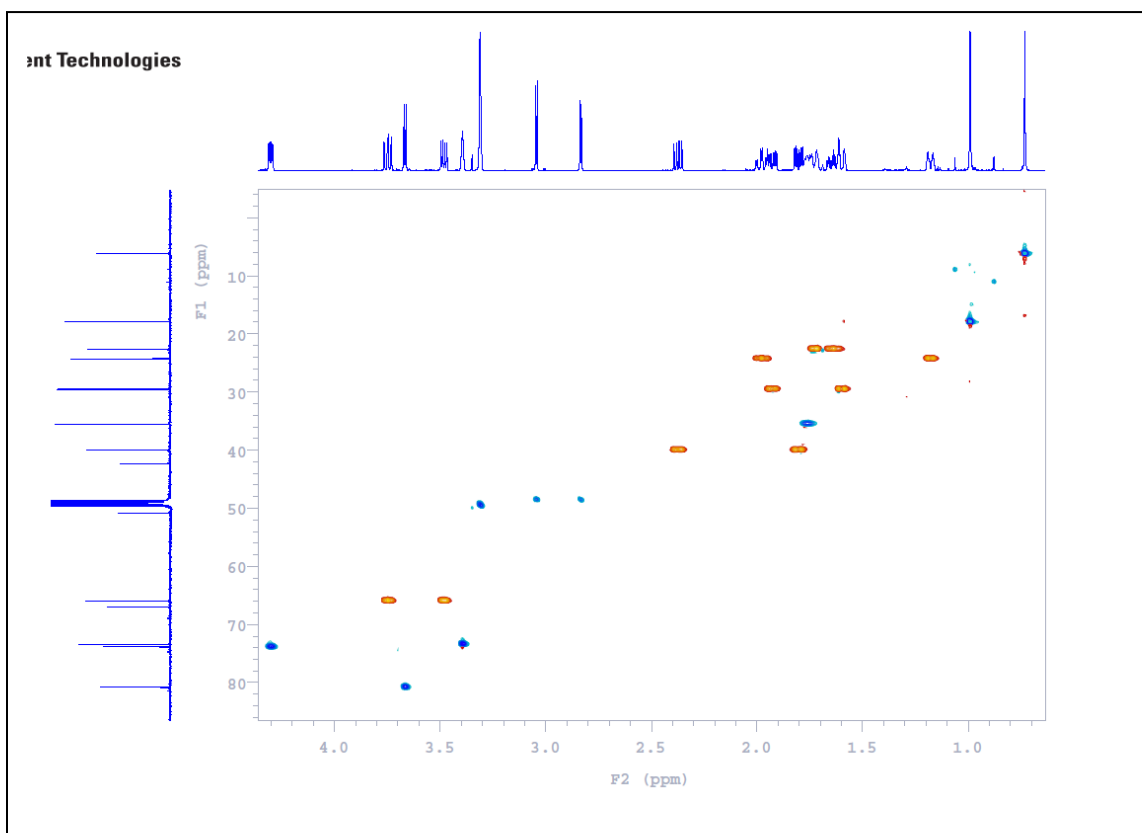

Figure S25. HSQC of **4**.

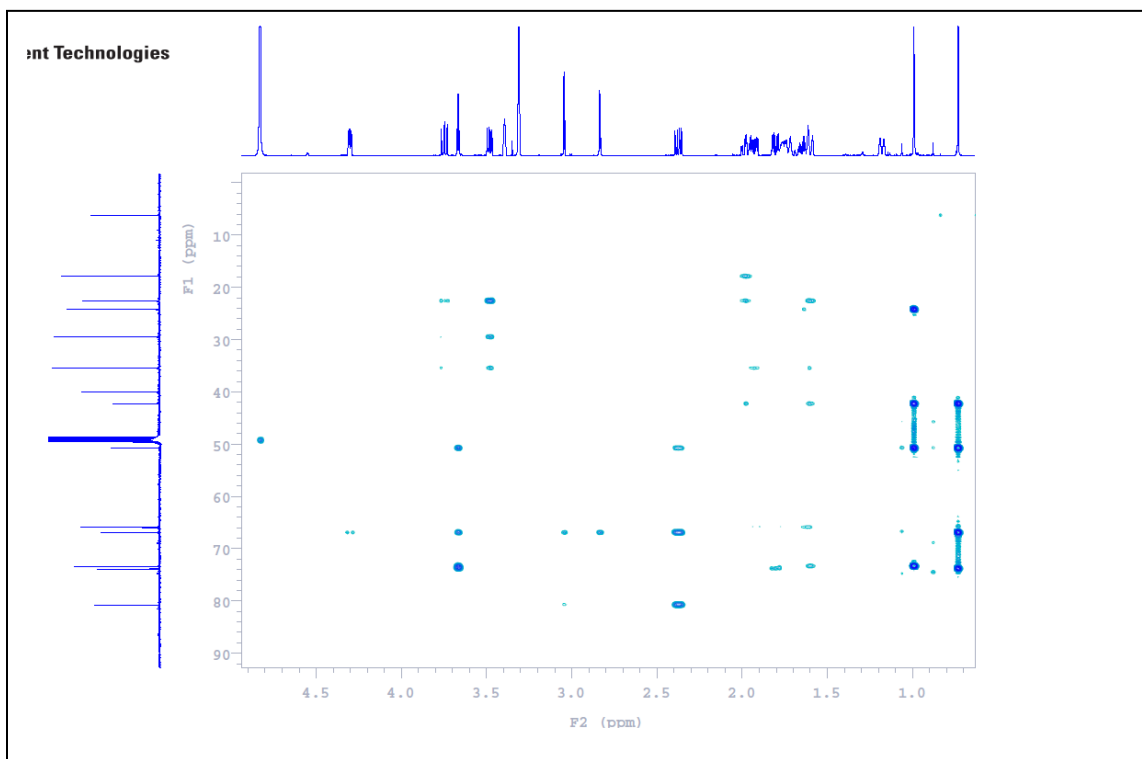

Figure S26. HMBC of **4**.

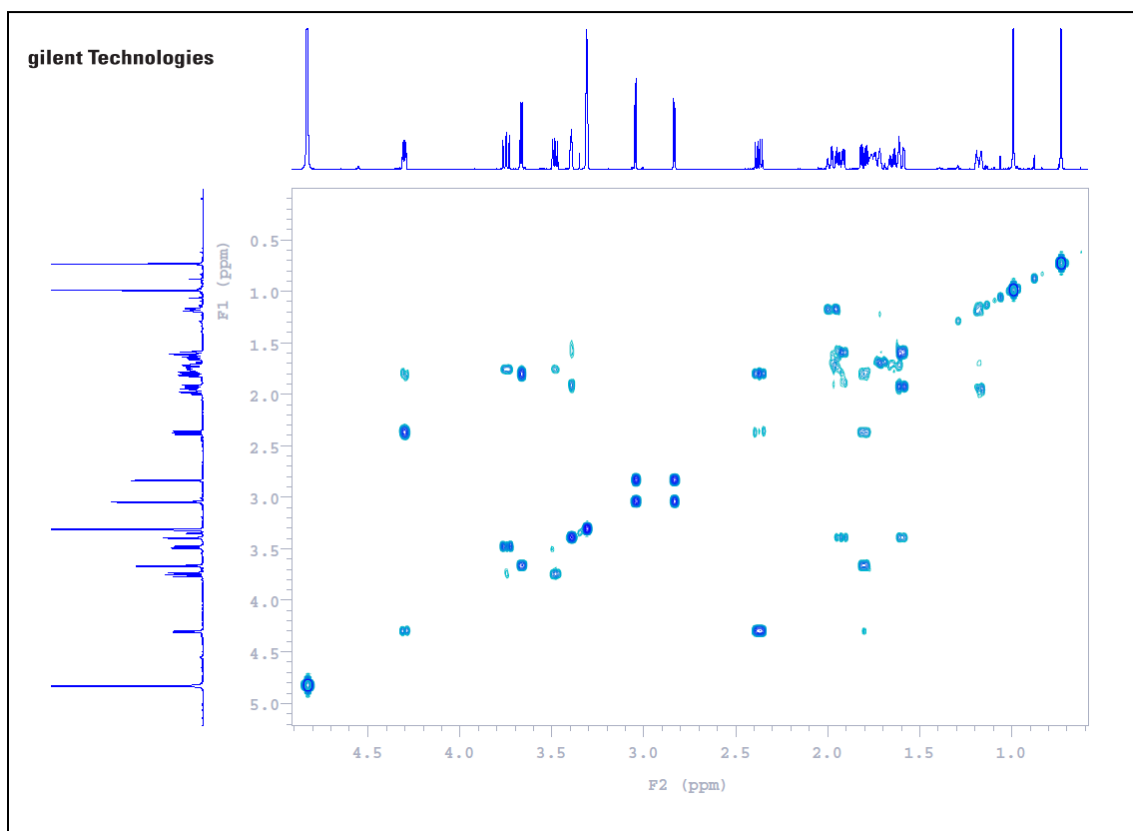

Figure S27. COSY of **4**.

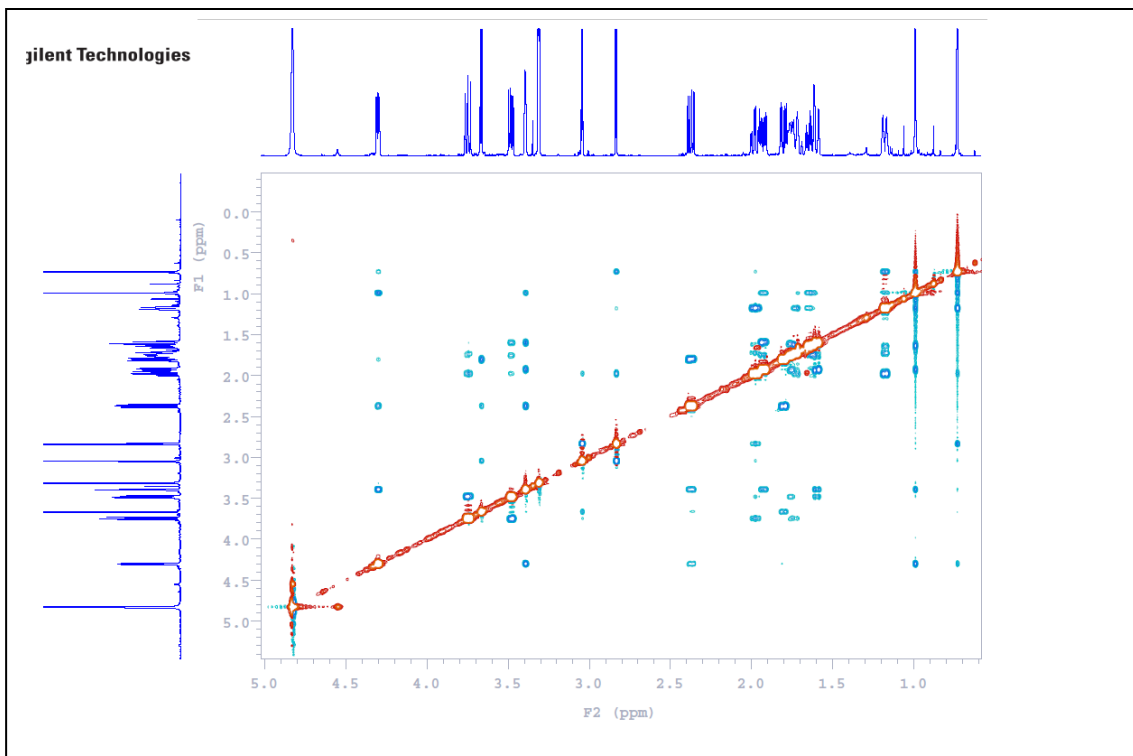

Figure S28. NEOSY of **4**.

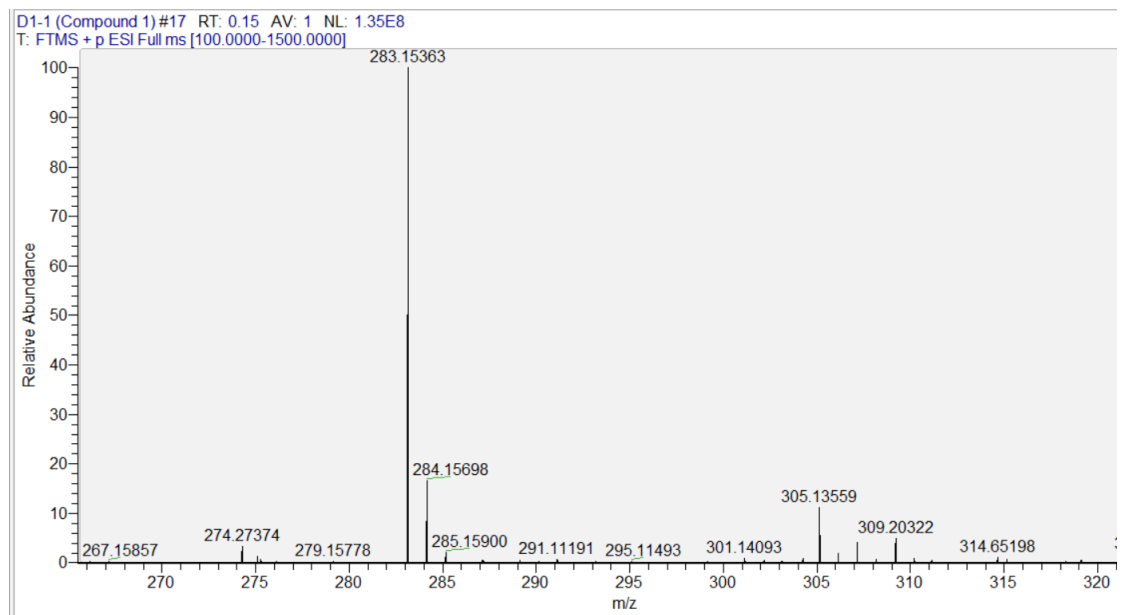

Figure S29. MS spectrum of **1**.

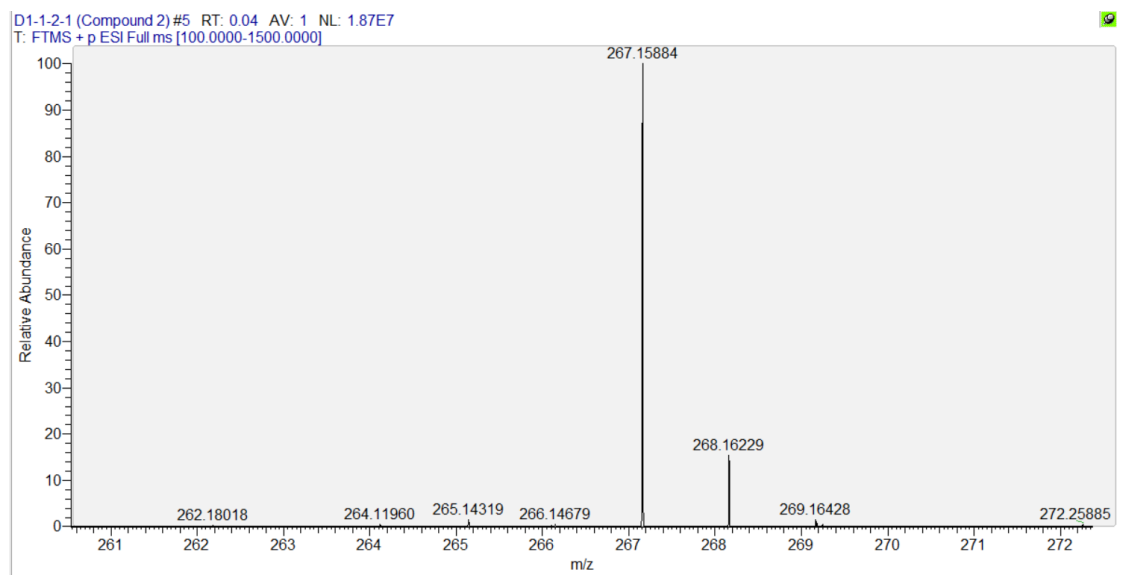

Figure S30. MS spectrum of **2**.



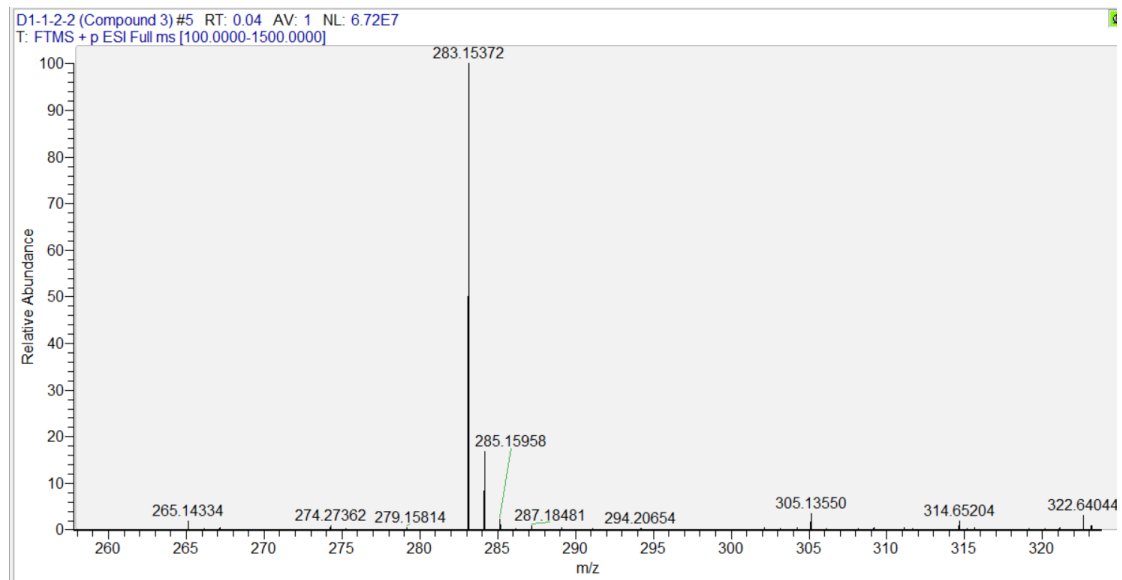

Figure S31. MS spectrum of **3**.

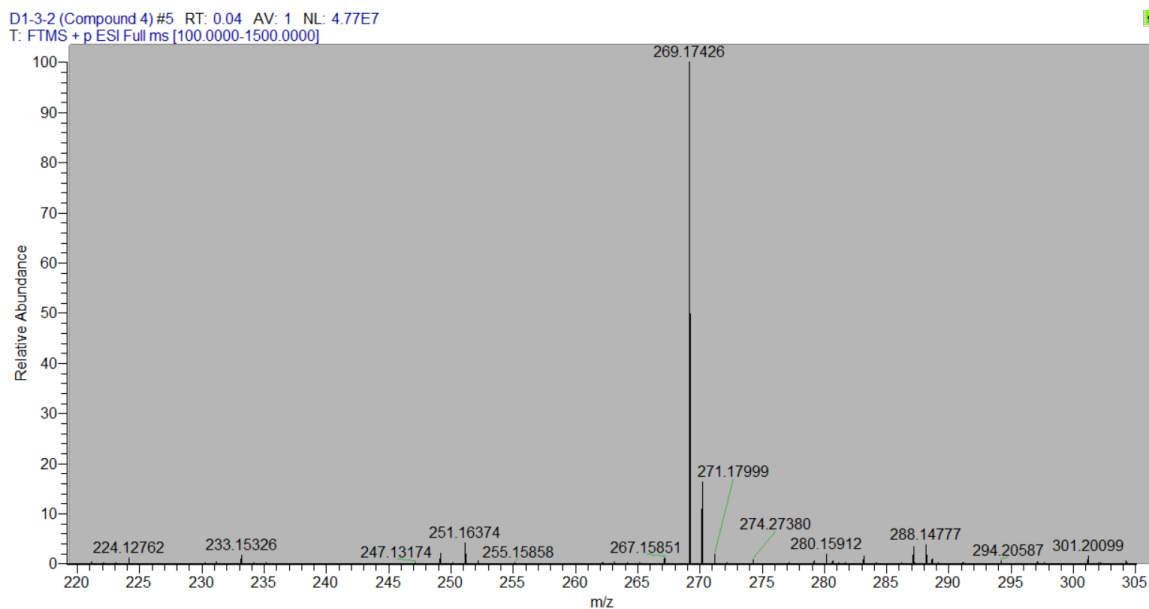

Figure S32. MS spectrum of **4**.

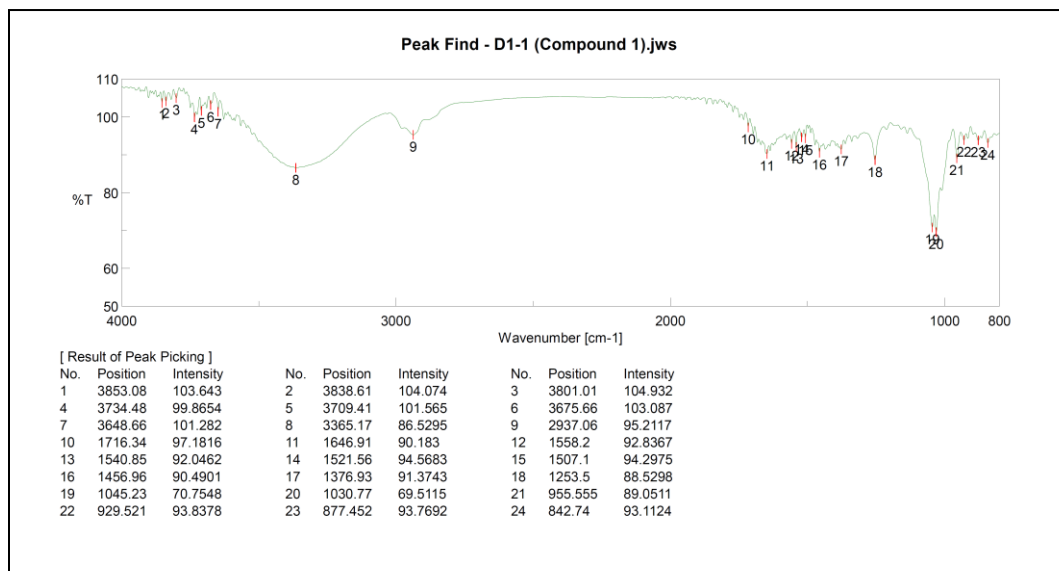

Figure S33. IR spectrum of **1**.

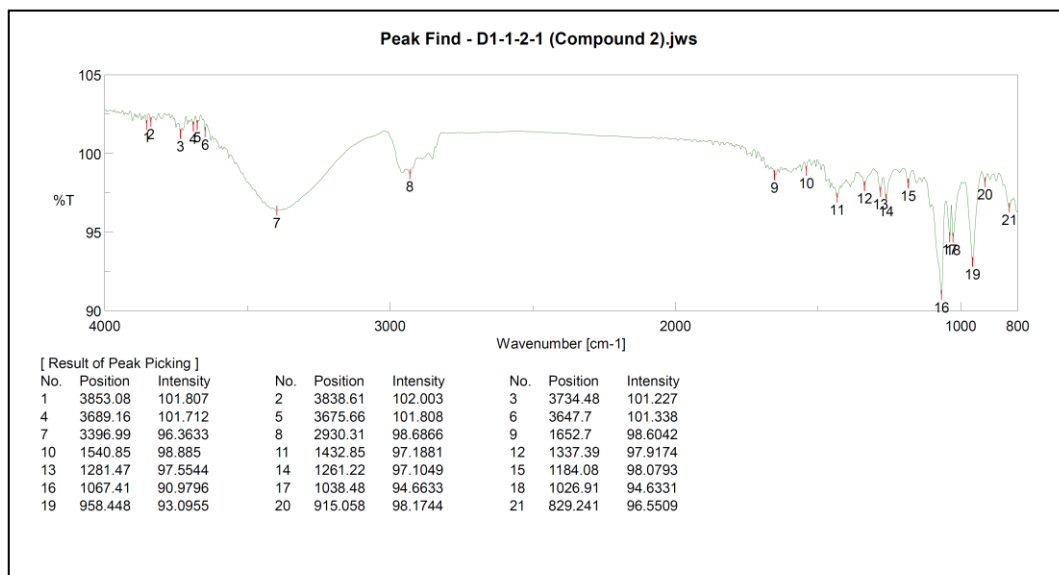

Figure S34. IR spectrum of **2**.

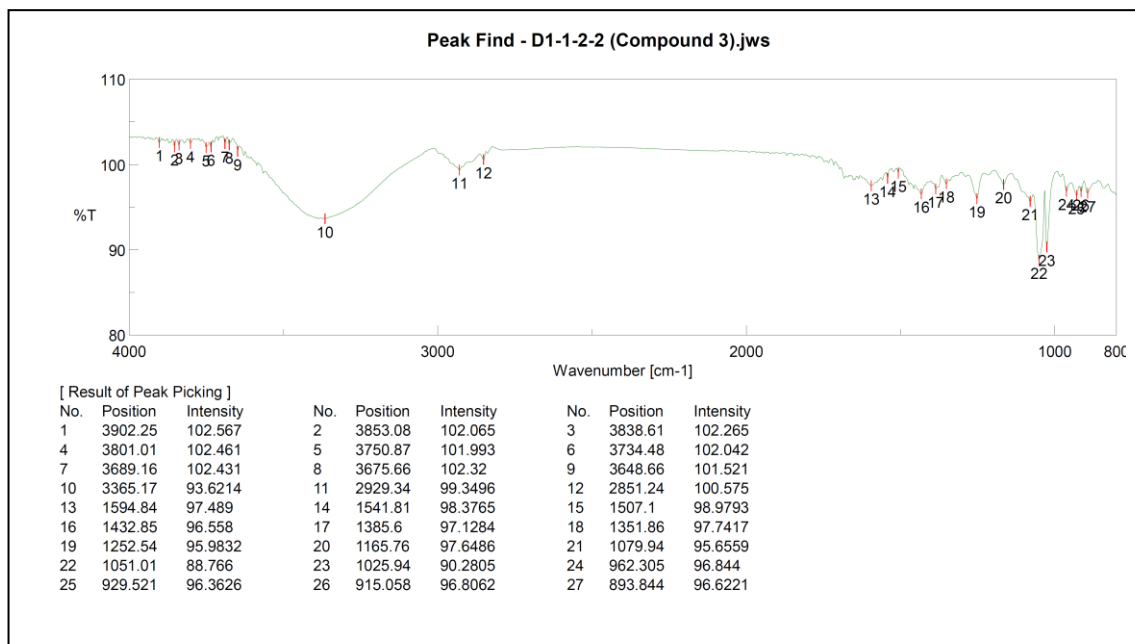

Figure S35. IR spectrum of **3**.

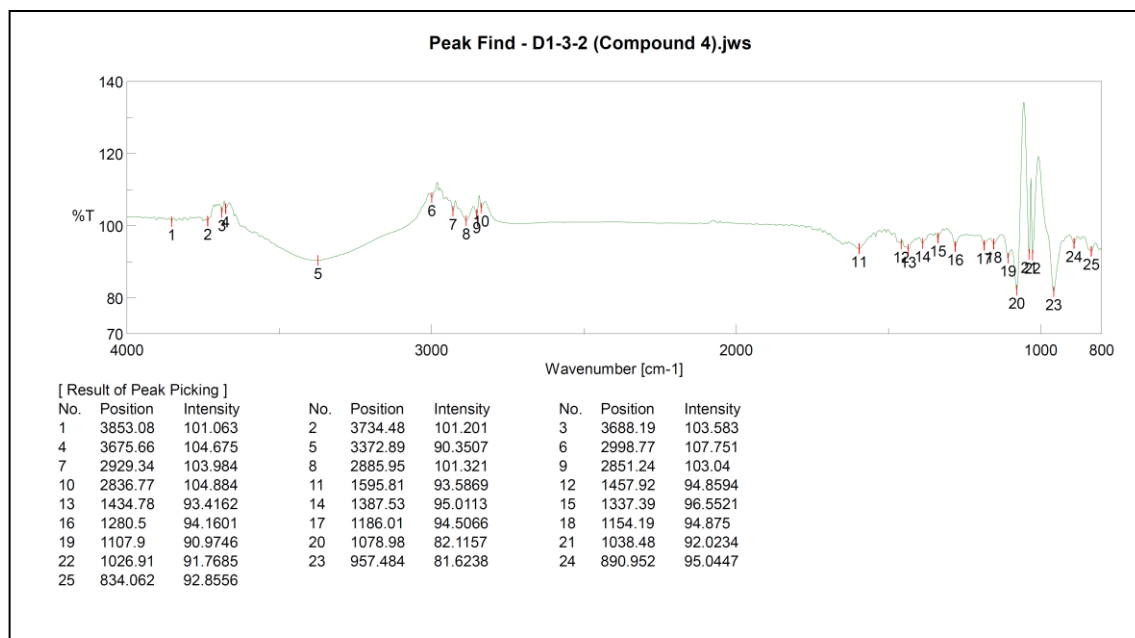

Figure S36. IR spectrum of **4**.

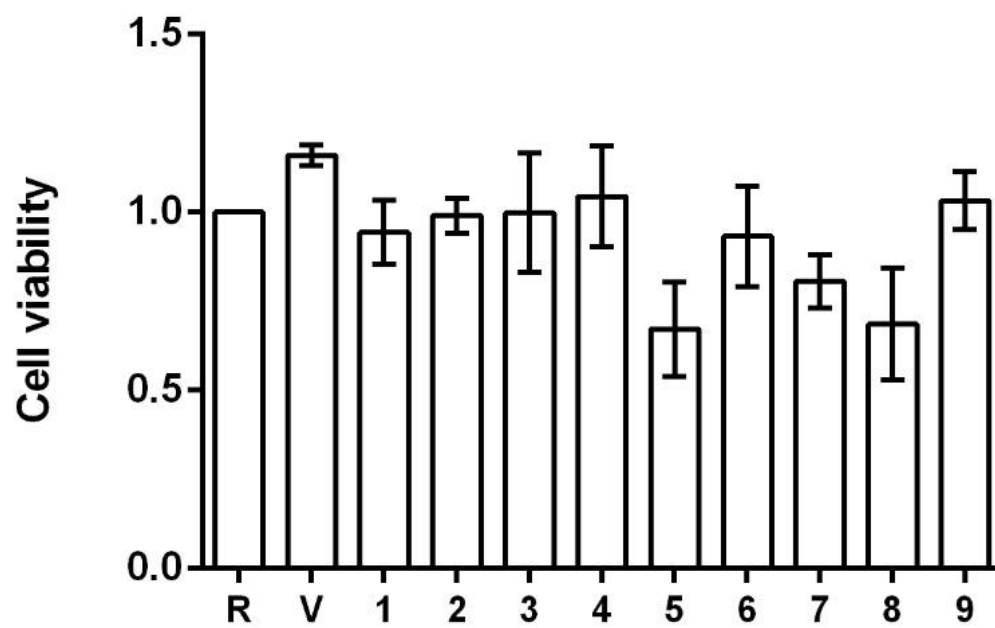

Figure S37. Cell viability in human THP-1 monocytic cells.

## Physical data of the new compounds

Trichoderminol B (**1**): Colorless oil ;  $[\alpha]_{\text{D}}^{25} -37.3$  (c 0.2, MeOH); IR ( $\nu_{\text{max}}$ , KBr): 3365, 2937, 1647, 1457, 1377, 1253, 1045, and 1031  $\text{cm}^{-1}$ ;  $^1\text{H}$  and  $^{13}\text{C}$  NMR data: see Table 1; HRESIMS  $[\text{M} - \text{H}_2\text{O} + \text{H}]^+$  at  $m/z$  283.1536 (calcd. 283.1540 for  $\text{C}_{15}\text{H}_{23}\text{O}_5$ ).

Trichoderminol C (**2**): Colorless oil;  $[\alpha]_{\text{D}}^{25} -24.5$  (c 0.2, MeOH); IR ( $\nu_{\text{max}}$ , KBr): 3397, 2930, 1652, 1433, 1337, 1261, 1067, and 1038  $\text{cm}^{-1}$ ;  $^1\text{H}$  and  $^{13}\text{C}$  NMR data: see Table 1; HRESIMS  $[\text{M} + \text{H}]^+$  at  $m/z$  267.1588 (calcd. 267.1590 for  $\text{C}_{15}\text{H}_{23}\text{O}_4$ ).

Trichoderminol D (**3**): Colorless gum;  $[\alpha]_{\text{D}}^{25} -18.3$  (c 0.2, MeOH); IR ( $\nu_{\text{max}}$ , KBr): 3365, 2929, 2851, 1595, 1433, 1386, 1352, 1252, 1166, 1080, 1051, and 1026  $\text{cm}^{-1}$ ;  $^1\text{H}$  and  $^{13}\text{C}$  NMR data: see Table 1; HRESIMS  $[\text{M} - \text{H}_2\text{O} + \text{H}]^+$  at  $m/z$  283.1537 (calcd. 283.1540 for  $\text{C}_{15}\text{H}_{23}\text{O}_5$ ).

Trichoderminol E (**4**): Colorless gum;  $[\alpha]_{\text{D}}^{25} -10.0$  (c 0.2, MeOH); IR ( $\nu_{\text{max}}$ , KBr): 3372, 2929, 2886, 1596, 1458, 1388, 1281, 1186, 1154, 1107, and 1079  $\text{cm}^{-1}$ ;  $^1\text{H}$  and  $^{13}\text{C}$  NMR data: see Table 1; HRESIMS  $[\text{M} + \text{H}]^+$  at  $m/z$  269.1743 (calcd. 269.1747 for  $\text{C}_{15}\text{H}_{25}\text{O}_4$ ).
